# Supplementary material
Source: PubMed Central journal article supplement (PMC2832142)

Supplemental Fig. 1

Location of tissue sections taken for histological analyses, and determinations of area of brain damage or FJ-B labeled cells

**A. Sections taken for histology**

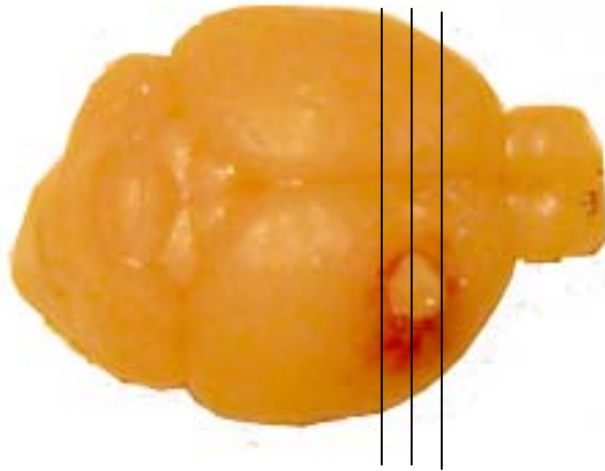

**C. Regions around hematoma analysed for FJ-B cells**

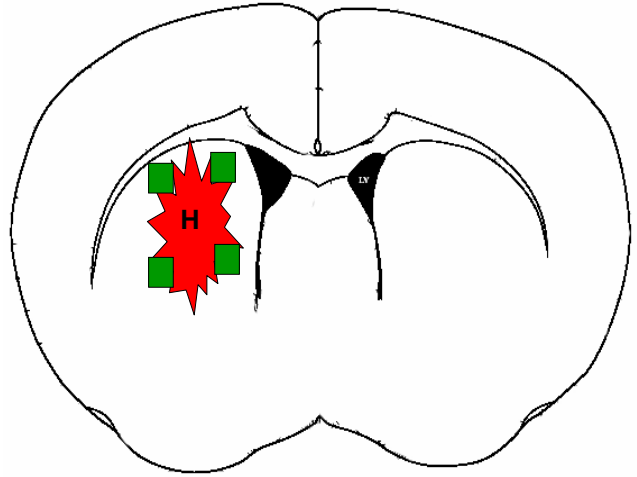

**H: hematoma**

**B. Area of brain damage per section**

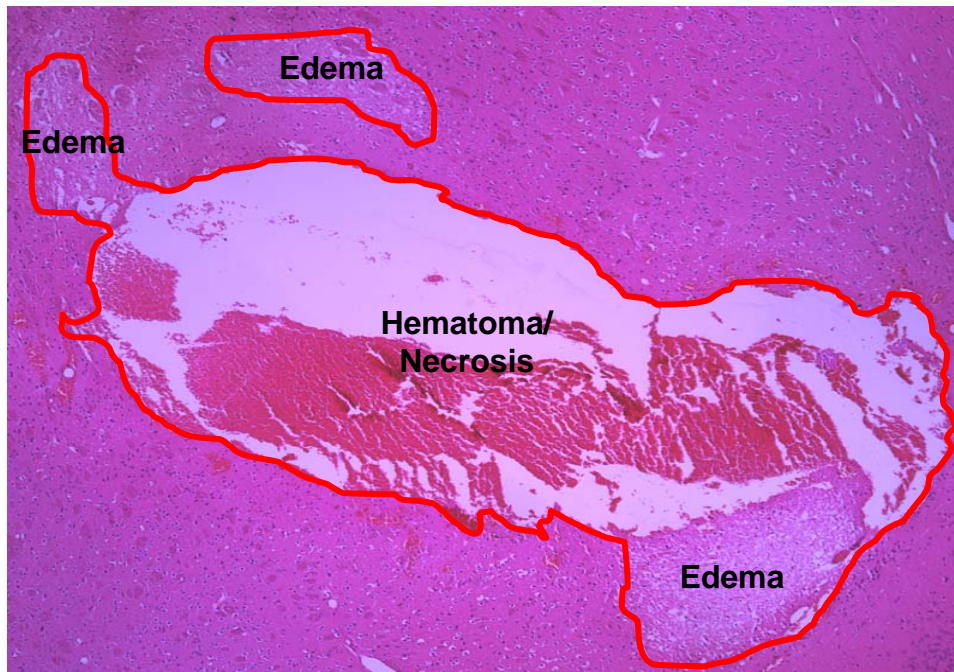

Supplement: mmc1.pdf [file mmc1.pdf]
