# Supplementary material
Source: PubMed Central journal article supplement (PMC2832142)
Supplement: mmc2.pdf [file mmc2.pdf]

Supplemental Fig. 2

**A. Infiltration of neutrophils**

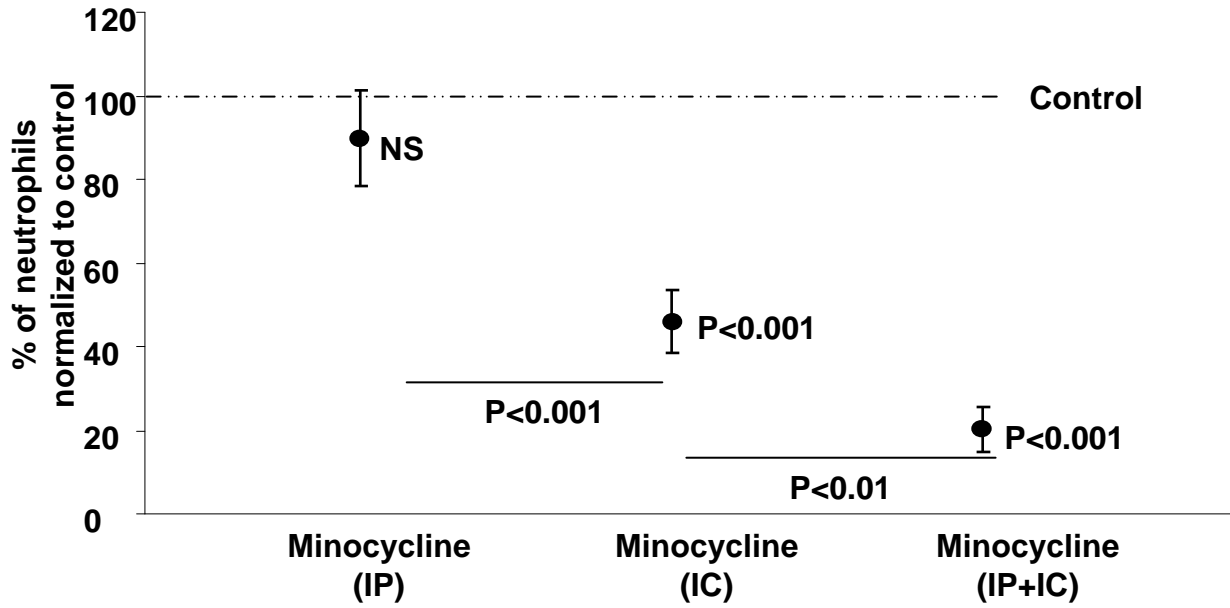

**B. Semiquantitative scores of microglia/macrophages activation**

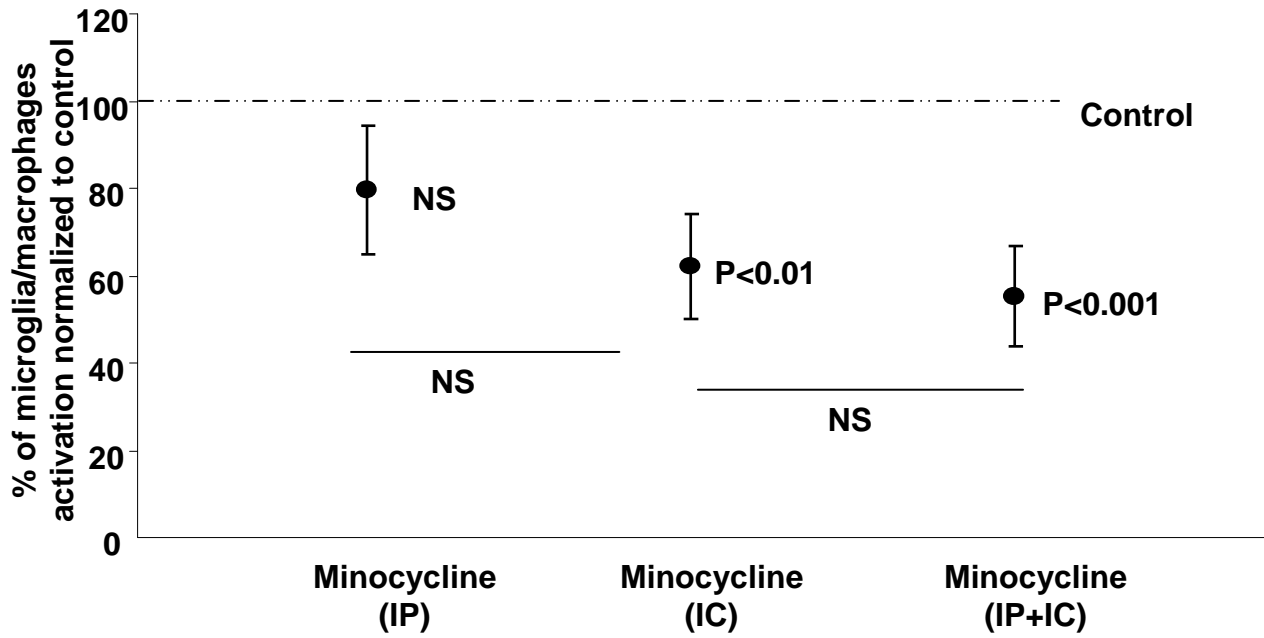

Minocycline: 50 mg/kg for IP, 10  $\mu$ g/ml for IC, given immediately after injury
